# Supplementary material for: Genotoxicity Evaluation of Propyl-Propane-Thiosulfinate (PTS) from Allium genus Essential Oils by a Combination of Micronucleus and Comet Assays in Rats
Source: MDPI journal article supplement (doi:10.3390/foods10050989), 2021-05-01
Supplement: s1 [file s1]

**Table S1:** measures of the% DNA in tail for the liver of the standard comet assay and the modified comet assay with enzymes in their different treatments: buffer F, FPG, Edo III.

| Groups           | Sex | N | Doses | SD break<br>(%DNA in tail) | Buffer F<br>(%DNA in tail) | FPG<br>(%DNA in tail) | ENDOIII<br>(%DNA in tail) |
|------------------|-----|---|-------|----------------------------|----------------------------|-----------------------|---------------------------|
| Negative Control | ♂   | 1 | -     | 1,42                       | 0,94                       | 2,18                  | 2,71                      |
|                  | ♂   | 2 | -     | 0,13                       | 0,12                       | 0,39                  | 0,15                      |
|                  | ♂   | 3 | -     | 0,12                       | 0,09                       | 0,18                  | 1,59                      |
|                  | ♂   | 4 | -     | 0,04                       | 0,10                       | 0,58                  | 0,36                      |
|                  | ♂   | 5 | -     | 0,05                       | 0,18                       | 0,95                  | 0,67                      |
|                  | ♀   | 1 | -     | 0,15                       | 0,01                       | 0,02                  | 0,03                      |
|                  | ♀   | 2 | -     | 0,23                       | 0,02                       | 0,16                  | 0,13                      |
|                  | ♀   | 3 | -     | 0,33                       | 0,02                       | 0,05                  | 1,05                      |
|                  | ♀   | 4 | -     | 0,40                       | 0,23                       | 1,28                  | 0,43                      |
|                  | ♀   | 5 | -     | 0,05                       | 0,03                       | 0,07                  | 0,13                      |
| Solvent Control  | ♂   | 1 | -     | 0,15                       | 1,36                       | 1,48                  | 2,26                      |
|                  | ♂   | 2 | -     | 0,18                       | 0,98                       | 1,06                  | 1,34                      |
|                  | ♂   | 3 | -     | 0,04                       | 0,08                       | 1,31                  | 0,62                      |
|                  | ♂   | 4 | -     | 0,03                       | 0,06                       | 0,13                  | 0,09                      |
|                  | ♂   | 5 | -     | 0,04                       | 0,01                       | 0,09                  | 0,01                      |
|                  | ♀   | 1 | -     | 0,36                       | 0,01                       | 0,02                  | 0,03                      |
|                  | ♀   | 2 | -     | 0,05                       | 0,01                       | 0,02                  | 0,01                      |
|                  | ♀   | 3 | -     | 0,10                       | 0,01                       | 0,29                  | 0,17                      |

|                                      |   |   |            |       |       |       |       |
|--------------------------------------|---|---|------------|-------|-------|-------|-------|
|                                      | ♀ | 4 | -          | 0,02  | 0,01  | 0,09  | 0,32  |
|                                      | ♀ | 5 | -          | 0,02  | 0,06  | 0,06  | 0,24  |
| Positive Control (EMS <sup>1</sup> ) | ♂ | 1 | 200.0mg/Kg | 34,32 | 36,59 | 48,13 | 51,36 |
|                                      | ♂ | 2 |            | 33,75 | 39,48 | 53,62 | 45,16 |
|                                      | ♂ | 3 |            | 30,00 | 28,37 | 37,48 | 54,83 |
|                                      | ♀ | 1 |            | 24,23 | 25,32 | 30,17 | 36,32 |
|                                      | ♀ | 2 |            | 23,55 | 18,40 | 23,22 | 28,18 |
|                                      | ♀ | 3 |            | 19,36 | 17,12 | 25,30 | 30,83 |
|                                      |   |   |            |       |       |       |       |
| 0,02P0,07TS                          | ♂ | 1 | 5.5 mg/Kg  | 0,21  | 0,04  | 2,40  | 0,13  |
|                                      | ♂ | 2 |            | 0,02  | 0,01  | 0,02  | 0,12  |
|                                      | ♂ | 3 |            | 0,01  | 0,03  | 0,06  | 0,51  |
|                                      | ♂ | 4 |            | 0,02  | 0,02  | 0,39  | 0,50  |
|                                      | ♂ | 5 |            | 0,03  | 0,02  | 0,21  | 0,04  |
|                                      | ♀ | 1 |            | 0,01  | 0,01  | 0,05  | 0,04  |
|                                      | ♀ | 2 |            | 0,01  | 0,01  | 0,01  | 0,06  |
|                                      | ♀ | 3 |            | 0,16  | 0,02  | 0,07  | 0,04  |
|                                      | ♀ | 4 |            | 0,04  | 0,02  | 0,03  | 0,06  |
|                                      | ♀ | 5 |            | 0,08  | 0,03  | 0,14  | 1,29  |
|                                      | ♂ | 1 | 17.4 mg/Kg | 0,02  | 0,01  | 0,02  | 0,22  |
|                                      | ♂ | 2 |            | 0,01  | 0,16  | 0,26  | 0,31  |
|                                      | ♂ | 3 |            | 0,05  | 0,07  | 0,37  | 0,37  |
|                                      | ♂ | 4 |            | 0,06  | 0,05  | 0,08  | 0,74  |

|  |   |   |            |      |      |      |      |
|--|---|---|------------|------|------|------|------|
|  | ♂ | 5 | 55.0 mg/Kg | 0,03 | 0,01 | 0,02 | 0,03 |
|  | ♀ | 1 |            | 0,07 | 0,02 | 0,38 | 0,23 |
|  | ♀ | 2 |            | 0,07 | 0,01 | 0,04 | 0,10 |
|  | ♀ | 3 |            | 0,39 | 0,00 | 0,02 | 0,12 |
|  | ♀ | 4 |            | 0,31 | 0,00 | 0,88 | 0,22 |
|  | ♀ | 5 |            | 0,01 | 0,04 | 0,09 | 0,84 |
|  | ♂ | 1 |            | 0,10 | 0,00 | 0,02 | 0,01 |
|  | ♂ | 2 |            | 0,13 | 0,01 | 0,09 | 0,03 |
|  | ♂ | 3 |            | 0,05 | 0,09 | 0,44 | 0,25 |
|  | ♂ | 4 |            | 0,03 | 0,18 | 1,41 | 0,61 |
|  | ♂ | 5 |            | 0,42 | 0,04 | 0,12 | 0,23 |
|  | ♀ | 1 |            | 0,05 | 0,00 | 0,04 | 0,40 |
|  | ♀ | 2 |            | 0,01 | 0,01 | 0,93 | 0,30 |
|  | ♀ | 3 |            | 0,01 | 0,00 | 0,01 | 1,17 |
|  | ♀ | 4 |            | 0,01 | 0,01 | 0,10 | 0,03 |
|  | ♀ | 5 |            | 0,06 | 0,00 | 0,00 | 1,08 |

The values are expressed as individual measurements

**Table S2:** measures of the% DNA in tail for the stomach of the standard comet assay and the modified comet assay with enzymes in their different treatments: buffer F, FPG, Edo III.

| Groups           | Sex | N | Doses | SD break<br>(%DNA in tail) | Buffer F<br>(%DNA in tail) | FPG<br>(%DNA in tail) | ENDOIII<br>(%DNA in tail) |
|------------------|-----|---|-------|----------------------------|----------------------------|-----------------------|---------------------------|
| Negative Control | ♂   | 1 | -     | 0,01                       | 2,08                       | 2,64                  | 4,54                      |
|                  | ♂   | 2 | -     | 0,02                       | 0,13                       | 0,80                  | 0,60                      |
|                  | ♂   | 3 | -     | 0,00                       | 1,02                       | 1,08                  | 6,01                      |
|                  | ♂   | 4 | -     | 0,01                       | 1,20                       | 2,80                  | 2,53                      |
|                  | ♂   | 5 | -     | 0,00                       | 1,08                       | 2,11                  | 4,17                      |
|                  | ♀   | 1 | -     | 0,04                       | 3,45                       | 5,19                  | 8,27                      |
|                  | ♀   | 2 | -     | 0,03                       | 0,51                       | 1,40                  | 1,72                      |
|                  | ♀   | 3 | -     | 0,04                       | 0,41                       | 1,57                  | 2,86                      |
|                  | ♀   | 4 | -     | 0,05                       | 0,32                       | 1,22                  | 4,25                      |
|                  | ♀   | 5 | -     | 0,05                       | 0,24                       | 1,03                  | 0,25                      |
| Solvent Control  | ♂   | 1 | -     | 0,03                       | 0,75                       | 2,05                  | 2,05                      |
|                  | ♂   | 2 | -     | 0,10                       | 0,42                       | 1,75                  | 1,65                      |
|                  | ♂   | 3 | -     | 0,05                       | 0,38                       | 0,99                  | 0,55                      |
|                  | ♂   | 4 | -     | 0,02                       | 0,65                       | 2,54                  | 2,67                      |
|                  | ♂   | 5 | -     | 0,00                       | 1,19                       | 2,65                  | 2,02                      |
|                  | ♀   | 1 | -     | 0,02                       | 0,28                       | 0,47                  | 0,85                      |
|                  | ♀   | 2 | -     | 0,05                       | 0,44                       | 1,14                  | 0,77                      |
|                  | ♀   | 3 | -     | 0,05                       | 0,09                       | 0,27                  | 0,28                      |

|                                      |   |   |            |       |       |       |       |
|--------------------------------------|---|---|------------|-------|-------|-------|-------|
|                                      | ♀ | 4 | -          | 0,06  | 1,10  | 2,09  | 1,16  |
|                                      | ♀ | 5 | -          | 0,03  | 0,20  | 0,22  | 0,22  |
| Positive Control (EMS <sup>1</sup> ) | ♂ | 1 | 200.0mg/Kg | 29,20 | 34,81 | 49,81 | 46,21 |
|                                      | ♂ | 2 |            | 12,72 | 52,29 | 64,42 | 67,13 |
|                                      | ♂ | 3 |            | 20,56 | 59,19 | 84,17 | 83,28 |
|                                      | ♀ | 1 |            | 15,03 | 43,95 | 60,97 | 54,78 |
|                                      | ♀ | 2 |            | 16,73 | 39,90 | 54,76 | 64,55 |
|                                      | ♀ | 3 |            | 12,49 | 45,87 | 55,87 | 61,71 |
|                                      | ♀ | 3 |            |       |       |       |       |
| PTS                                  | ♂ | 1 | 5.5 mg/Kg  | 0,00  | 0,16  | 0,27  | 0,18  |
|                                      | ♂ | 2 |            | 0,10  | 0,18  | 0,19  | 0,59  |
|                                      | ♂ | 3 |            | 0,00  | 0,42  | 0,93  | 1,93  |
|                                      | ♂ | 4 |            | 0,01  | 0,35  | 0,58  | 2,65  |
|                                      | ♂ | 5 |            | 0,01  | 0,27  | 0,98  | 0,41  |
|                                      | ♀ | 1 |            | 0,00  | 0,22  | 0,65  | 0,23  |
|                                      | ♀ | 2 |            | 0,00  | 0,17  | 0,28  | 0,29  |
|                                      | ♀ | 3 |            | 0,00  | 0,52  | 2,67  | 1,78  |
|                                      | ♀ | 4 |            | 0,00  | 0,04  | 0,09  | 0,30  |
|                                      | ♀ | 5 |            | 0,00  | 0,03  | 0,08  | 0,13  |
|                                      | ♂ | 1 | 17.4 mg/Kg | 0,03  | 0,54  | 0,59  | 0,85  |
|                                      | ♂ | 2 |            | 0,01  | 0,01  | 5,42  | 0,25  |
|                                      | ♂ | 3 |            | 0,00  | 0,46  | 1,46  | 0,65  |
|                                      | ♂ | 4 |            | 0,01  | 1,02  | 1,49  | 2,10  |

|  |   |   |            |      |      |      |      |
|--|---|---|------------|------|------|------|------|
|  | ♂ | 5 |            | 0,01 | 3,70 | 4,97 | 7,05 |
|  | ♀ | 1 |            | 0,00 | 0,21 | 0,52 | 0,85 |
|  | ♀ | 2 |            | 0,00 | 0,07 | 0,46 | 0,30 |
|  | ♀ | 3 |            | 0,02 | 0,20 | 0,34 | 0,26 |
|  | ♀ | 4 |            | 0,00 | 1,01 | 2,09 | 7,02 |
|  | ♀ | 5 |            | 0,03 | 0,36 | 1,28 | 0,70 |
|  | ♂ | 1 | 55.0 mg/Kg | 0,14 | 0,40 | 1,53 | 0,57 |
|  | ♂ | 2 |            | 0,00 | 0,17 | 0,64 | 0,44 |
|  | ♂ | 3 |            | 0,05 | 0,31 | 1,34 | 0,94 |
|  | ♂ | 4 |            | 0,02 | 0,61 | 1,41 | 6,07 |
|  | ♂ | 5 |            | 0,03 | 1,71 | 3,62 | 3,08 |
|  | ♀ | 1 |            | 0,00 | 0,13 | 2,80 | 4,53 |
|  | ♀ | 2 |            | 0,00 | 2,18 | 5,93 | 5,62 |
|  | ♀ | 3 |            | 0,00 | 0,77 | 1,03 | 2,87 |
|  | ♀ | 4 |            | 0,00 | 0,35 | 0,44 | 1,04 |
|  | ♀ | 5 |            | 0,02 | 0,38 | 0,48 | 0,55 |

The values are expressed as individual measurements.

**Table S3:** measures of the% DNA in tail for the blood of the standard comet assay and the modified comet assay with enzymes in their different treatments: buffer F, FPG, Edo III.

| Groups           | Sex | N | Doses | SD break<br>(%DNA in tail) | Buffer F<br>(%DNA in tail) | FPG<br>(%DNA in tail) | ENDOIII<br>(%DNA in tail) |
|------------------|-----|---|-------|----------------------------|----------------------------|-----------------------|---------------------------|
| Negative Control | ♂   | 1 | -     | 1,51                       | 0,82                       | 1,10                  | 2,04                      |
|                  | ♂   | 2 | -     | 0,18                       | 0,34                       | 0,91                  | 1,13                      |
|                  | ♂   | 3 | -     | 0,01                       | 0,17                       | 0,51                  | 0,95                      |
|                  | ♂   | 4 | -     | 0,16                       | 0,03                       | 0,15                  | 0,06                      |
|                  | ♂   | 5 | -     | 0,03                       | 0,45                       | 0,75                  | 1,03                      |
|                  | ♀   | 1 | -     | 0,14                       | 0,03                       | 0,23                  | 0,19                      |
|                  | ♀   | 2 | -     | 0,36                       | 0,06                       | 0,36                  | 0,10                      |
|                  | ♀   | 3 | -     | 0,04                       | 0,12                       | 0,14                  | 0,20                      |
|                  | ♀   | 4 | -     | 0,02                       | 0,06                       | 0,42                  | 0,52                      |
|                  | ♀   | 5 | -     | 0,16                       | 0,04                       | 0,28                  | 0,26                      |
| Solvent Control  | ♂   | 1 | -     | 0,29                       | 0,10                       | 0,19                  | 0,15                      |
|                  | ♂   | 2 | -     | 0,47                       | 0,08                       | 0,27                  | 0,11                      |
|                  | ♂   | 3 | -     | 0,06                       | 0,46                       | 1,33                  | 1,19                      |
|                  | ♂   | 4 | -     | 1,16                       | 0,37                       | 0,67                  | 0,57                      |
|                  | ♂   | 5 | -     | 0,10                       | 0,06                       | 0,21                  | 0,44                      |
|                  | ♀   | 1 | -     | 0,06                       | 0,01                       | 0,07                  | 0,76                      |
|                  | ♀   | 2 | -     | 0,02                       | 0,03                       | 0,15                  | 0,35                      |
|                  | ♀   | 3 | -     | 0,01                       | 0,10                       | 0,18                  | 0,15                      |

|                                      |   |   |            |       |       |       |       |
|--------------------------------------|---|---|------------|-------|-------|-------|-------|
|                                      | ♀ | 4 | -          | 0,04  | 0,04  | 0,93  | 0,08  |
|                                      | ♀ | 5 | -          | 0,03  | 0,08  | 1,18  | 0,58  |
| Positive Control (EMS <sup>1</sup> ) | ♂ | 1 | 200.0mg/Kg | 43,70 | 23,65 | 33,63 | 35,45 |
|                                      | ♂ | 2 |            | 67,48 | 21,78 | 38,23 | 37,70 |
|                                      | ♂ | 3 |            | 56,65 | 20,34 | 39,90 | 40,59 |
|                                      | ♀ | 1 |            | 28,64 | 20,45 | 41,10 | 40,99 |
|                                      | ♀ | 2 |            | 35,55 | 24,13 | 32,03 | 39,91 |
|                                      | ♀ | 3 |            | 41,77 | 19,54 | 34,19 | 34,38 |
|                                      | ♀ | 3 |            | 41,77 | 19,54 | 34,19 | 34,38 |
| PTS                                  | ♂ | 1 | 5.5 mg/Kg  | 0,31  | 0,03  | 0,25  | 0,13  |
|                                      | ♂ | 2 |            | 0,03  | 0,00  | 0,32  | 0,08  |
|                                      | ♂ | 3 |            | 0,08  | 0,04  | 0,19  | 0,04  |
|                                      | ♂ | 4 |            | 0,22  | 0,02  | 0,13  | 0,10  |
|                                      | ♂ | 5 |            | 0,18  | 0,04  | 0,09  | 0,24  |
|                                      | ♀ | 1 |            | 0,24  | 0,03  | 1,35  | 1,35  |
|                                      | ♀ | 2 |            | 0,64  | 0,04  | 1,14  | 0,08  |
|                                      | ♀ | 3 |            | 0,05  | 0,06  | 0,08  | 0,41  |
|                                      | ♀ | 4 |            | 0,23  | 0,05  | 0,55  | 0,13  |
|                                      | ♀ | 5 |            | 0,29  | 0,07  | 0,13  | 0,26  |
|                                      | ♂ | 1 | 17.4 mg/Kg | 0,02  | 0,03  | 0,04  | 0,31  |
|                                      | ♂ | 2 |            | 0,63  | 0,08  | 0,13  | 0,24  |
|                                      | ♂ | 3 |            | 0,07  | 0,04  | 0,31  | 0,02  |
|                                      | ♂ | 4 |            | 0,16  | 0,02  | 0,06  | 0,22  |



|  |   |   |            |      |      |      |      |
|--|---|---|------------|------|------|------|------|
|  | ♂ | 5 |            | 0,08 | 0,04 | 0,24 | 0,33 |
|  | ♀ | 1 |            | 0,03 | 0,03 | 0,05 | 1,15 |
|  | ♀ | 2 |            | 0,04 | 0,04 | 0,19 | 0,44 |
|  | ♀ | 3 |            | 0,02 | 0,06 | 0,34 | 0,09 |
|  | ♀ | 4 |            | 0,02 | 0,05 | 0,05 | 0,08 |
|  | ♀ | 5 |            | 0,02 | 0,07 | 0,30 | 0,36 |
|  | ♂ | 1 | 55.0 mg/Kg | 0,04 | 0,04 | 0,21 | 2,98 |
|  | ♂ | 2 |            | 0,01 | 0,07 | 0,26 | 0,23 |
|  | ♂ | 3 |            | 0,18 | 0,00 | 0,00 | 0,02 |
|  | ♂ | 4 |            | 0,31 | 0,07 | 0,08 | 0,11 |
|  | ♂ | 5 |            | 0,04 | 0,08 | 0,09 | 0,17 |
|  | ♀ | 1 |            | 0,27 | 0,01 | 0,18 | 0,29 |
|  | ♀ | 2 |            | 0,99 | 0,11 | 0,43 | 0,31 |
|  | ♀ | 3 |            | 0,31 | 0,08 | 0,43 | 0,25 |
|  | ♀ | 4 |            | 1,60 | 0,05 | 0,81 | 0,21 |
|  | ♀ | 5 |            | 0,21 | 0,01 | 0,12 | 0,06 |

The values are expressed as individual measurements.
